# Supplementary material for: Redox responses are preserved across muscle fibres with differential susceptibility to aging
Source: PubMed Central journal article supplement (PMC5884322; doi:10.1016/j.jprot.2018.02.015), 2018-04-15
Supplement: mmc1.pdf [file mmc1.pdf]

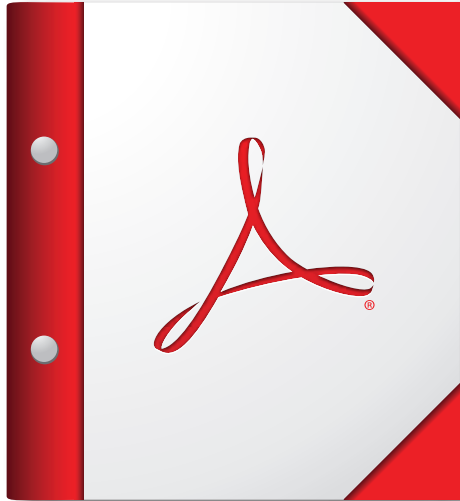

**For the best experience, open this PDF portfolio in  
Acrobat 9 or Adobe Reader 9, or later.**

[Get Adobe Reader Now!](#)
